# Supplementary material for: Polar nematic phases with enantiotropic ferro- and antiferroelectric behaviour
Source: Royal Society of Chemistry journal article supplement (doi:10.1039/d4tc01038h), 2024-01-01

*Supporting Information*

**Polar Nematic Phases with Enantiotropic Ferro- and Antiferroelectric Behaviour**

Mateusz Mrukiewicz<sup>a</sup>, Michał Czerwiński<sup>b\*</sup>, Natalia Podoliak<sup>c</sup>, Dalibor Repčák<sup>c,d</sup>, Paweł Perkowski<sup>a</sup>, Richard. J. Mandle<sup>e,f</sup>, Dorota Węglowska<sup>b</sup>

- a. Institute of Applied Physics, Military University of Technology, Kaliskiego 2, 00-908 Warsaw, Poland
- b. Institute of Chemistry, Military University of Technology, Kaliskiego 2, 00-908 Warsaw, Poland, Email: [michal.czerwinski@wat.edu.pl](mailto:michal.czerwinski@wat.edu.pl)
- c. Institute of Physics, Academy of Science of the Czech Republic, Na Slovance 2, 182 00 Prague 8, Czech Republic
- d. Faculty of Nuclear Sciences and Physical Engineering, Czech Technical University in Prague, Břehová 7, 110 00 Prague 1, Czech Republic
- e. School of Chemistry, University of Leeds, Leeds, UK, LS2 9JT
- f. School of Physics and Astronomy, University of Leeds, Leeds, UK, LS2 9JT

A

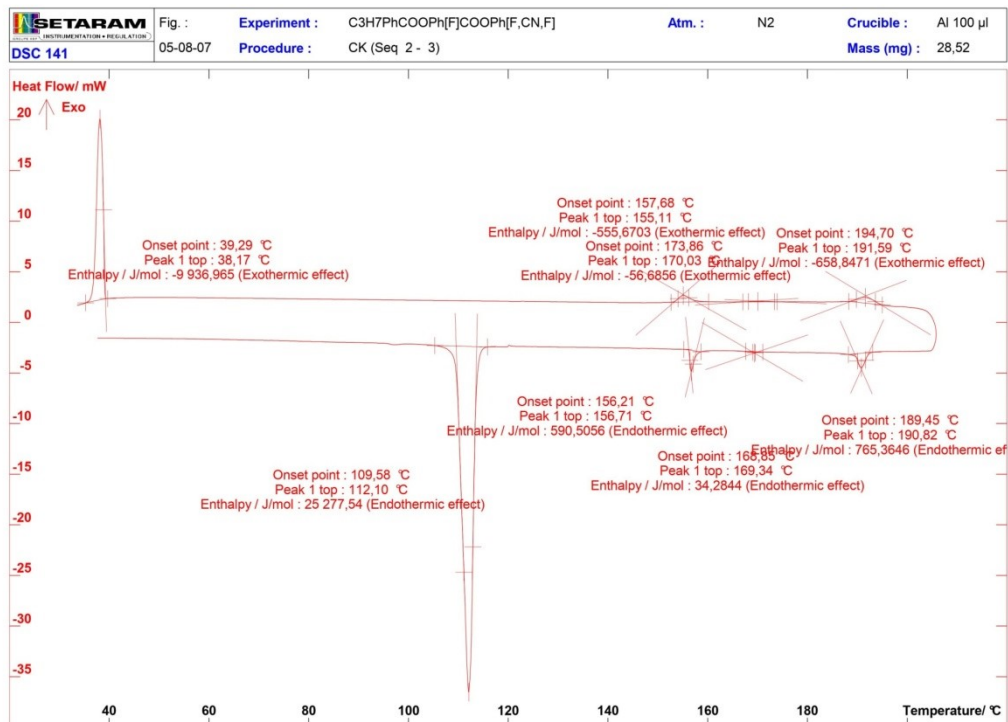

B

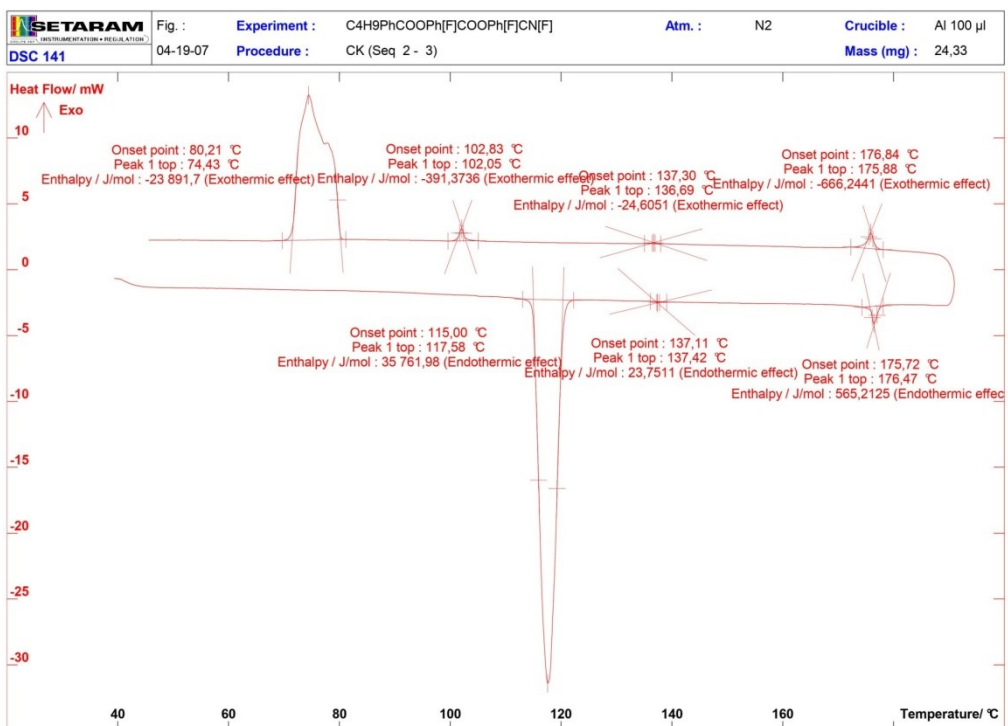

**Fig. S1** The DSC thermograms of compound 3CN (A) and 4CN (B) in the heating cycles (down curves) and cooling cycles (upper curves).

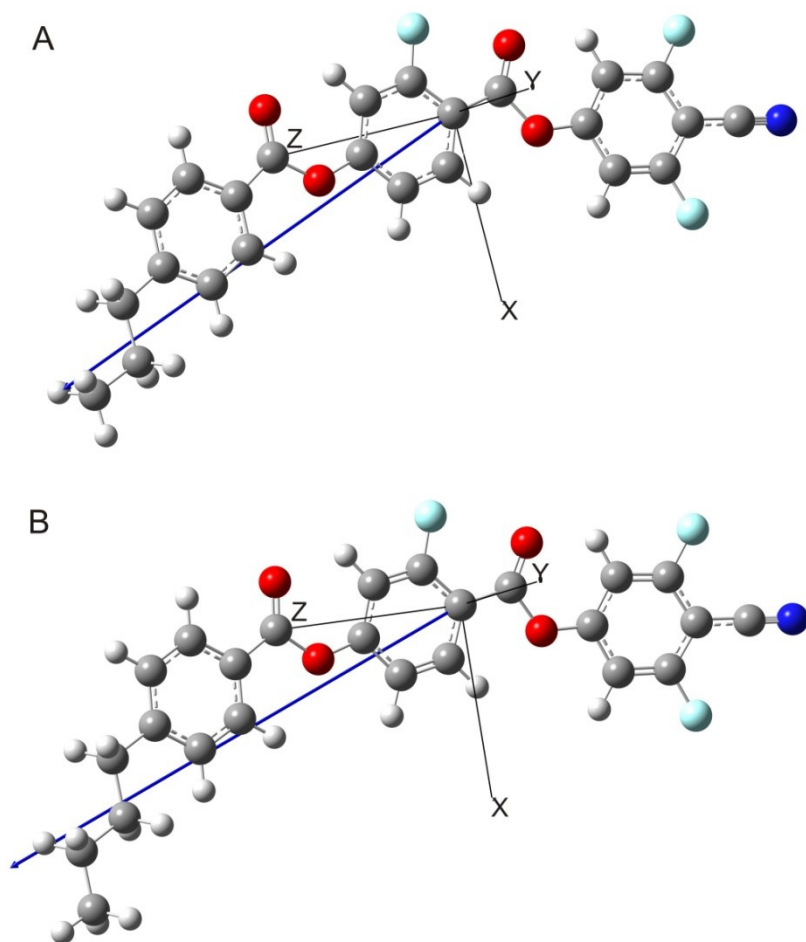

**Fig. S2** The optimized geometric general structure of compounds 3CN (A) and 4CN (B); whereas  $x$  is the axis in the plane of the phenyl rings,  $y$  - the axis perpendicular to the plane of the phenyl rings and  $z$ -the axis along to the principal molecular axis.

VIDEO-S1

**Video S1** The movie showing the texture change obtained for material between untreated glass plates under cross polarizers during cooling from the nematic (N) to the ferroelectric nematic ( $N_F$ ) phases for 3CN compound.

VIDEO-S2

**Video S2** The movie showing the texture change obtained for planarly aligned material after applying a triangular in-plane wave electric field of 2 Vpp/20  $\mu\text{m}$  with a frequency of 100 mHz in the  $N_F$  phase of the 3CN compound.

VIDEO-S3

**Video S3** The movie showing the texture change obtained for planarly aligned material after applying a triangular in-plane wave electric field of 1.2 Vpp/20  $\mu\text{m}$  with a frequency of 100 mHz in the  $N_F$  phase of the 4CN compound.

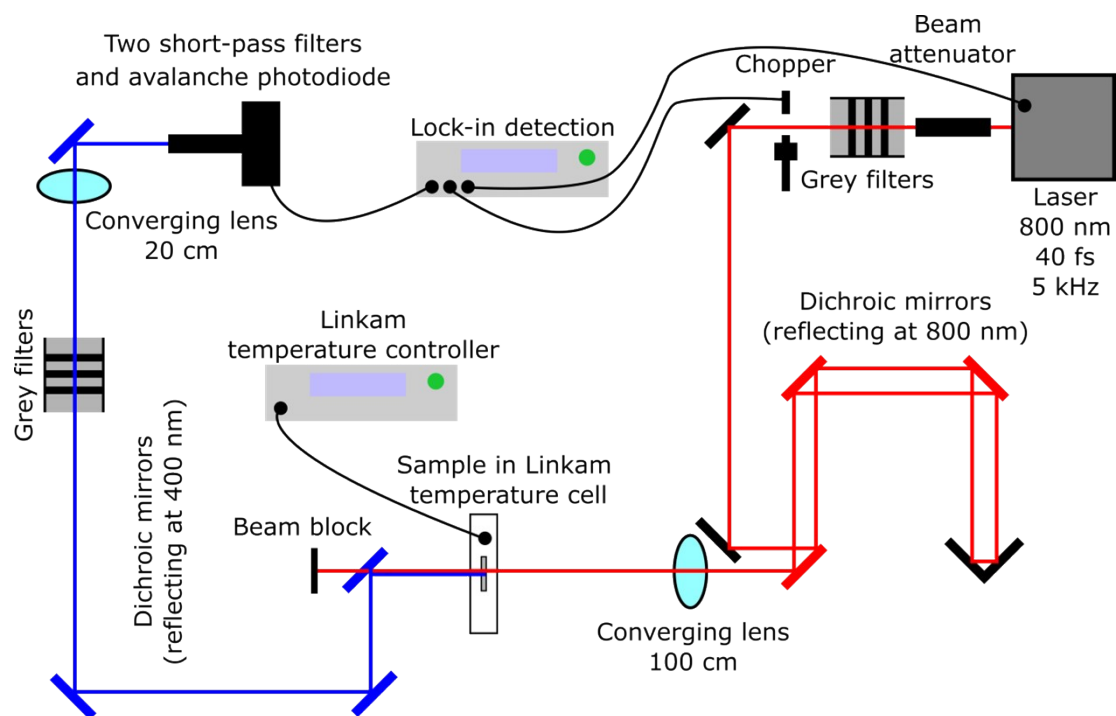

**Scheme S1** The set-up for the temperature-dependent second harmonic generation (SHG) measurements.

The structure of 3CN and 4CN compounds was confirmed by using of  $^1\text{H}$  and  $^{13}\text{C}$  NMR Spectrometer ((Bruker, Avance III HD, 500 Hz; in  $\text{CDCl}_3$ , Billerica, MA, USA). The spectra are presented below.

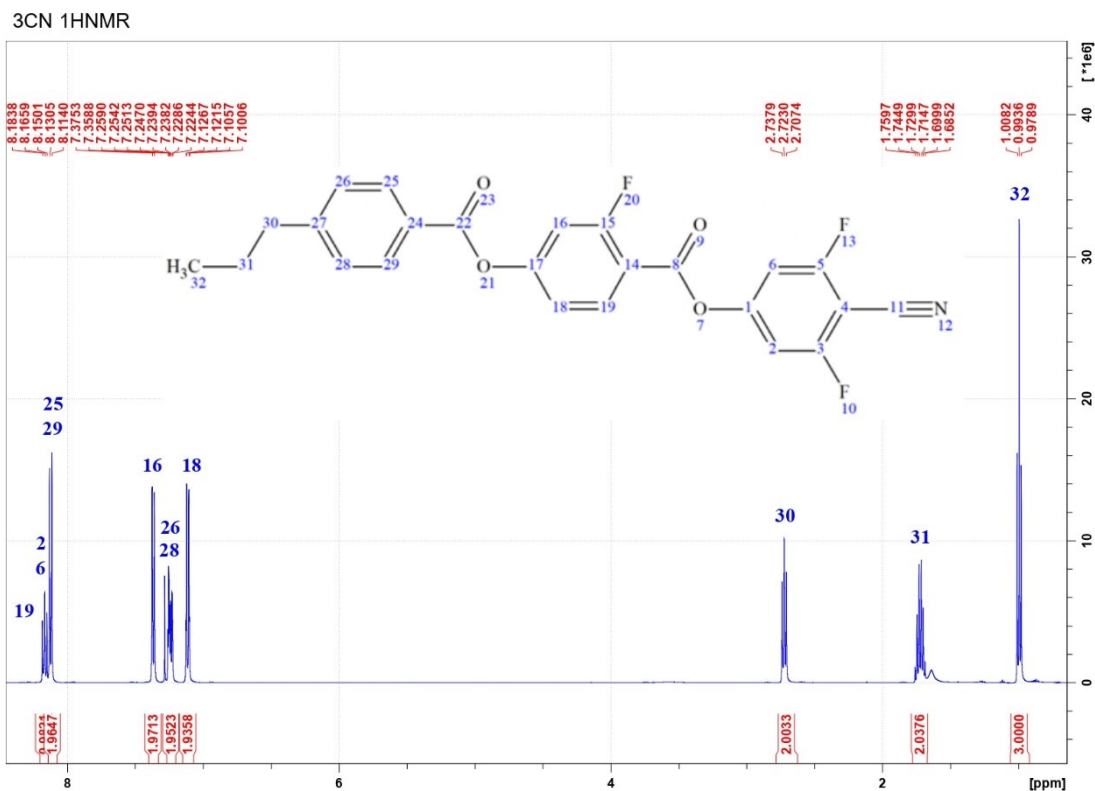

3CN 13CNMR

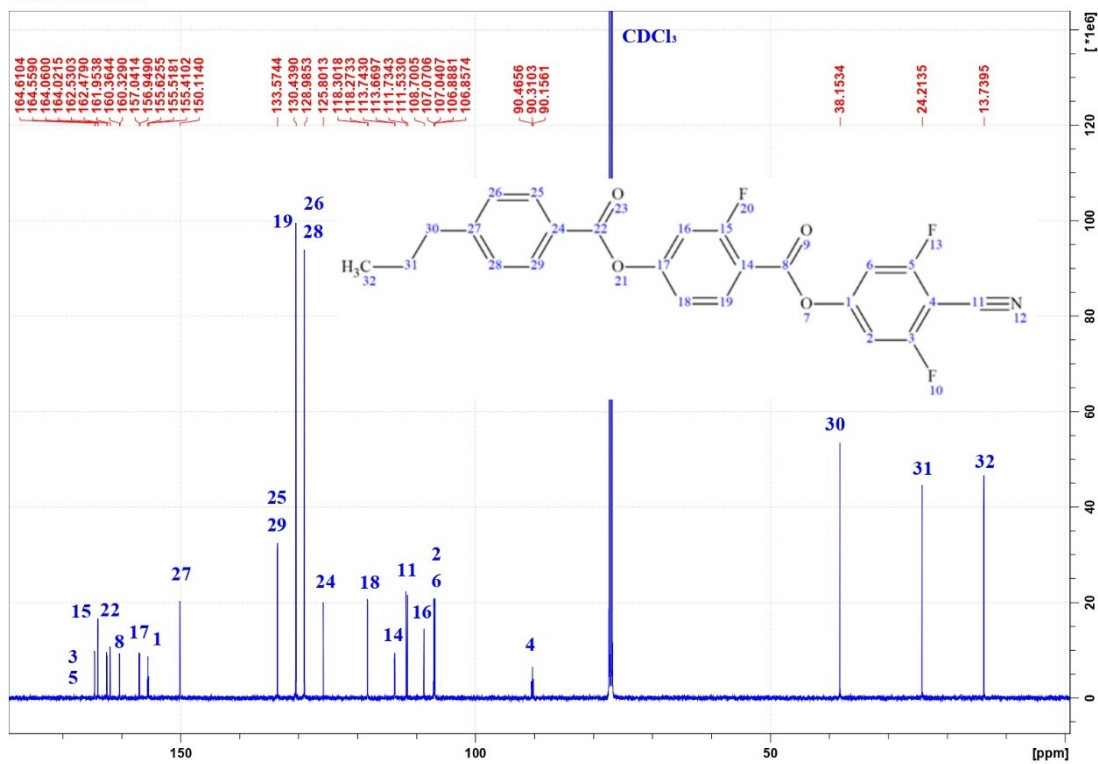

4CN 1HNMR

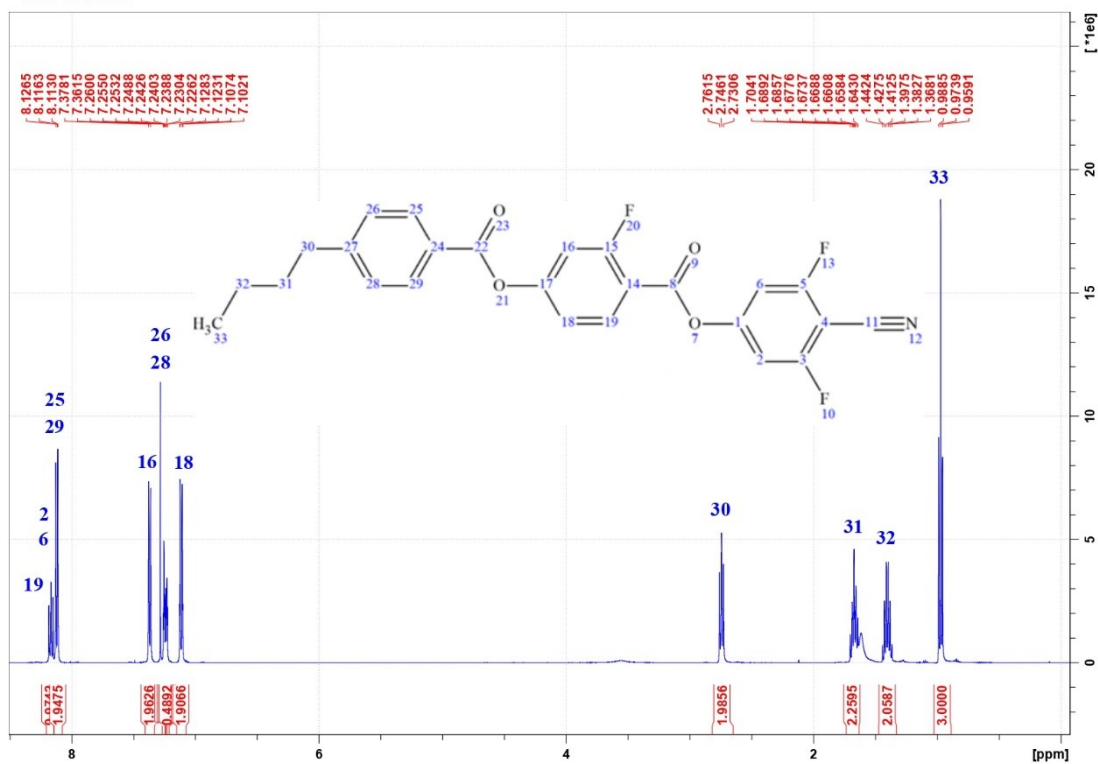

## 4CN 13CNMR

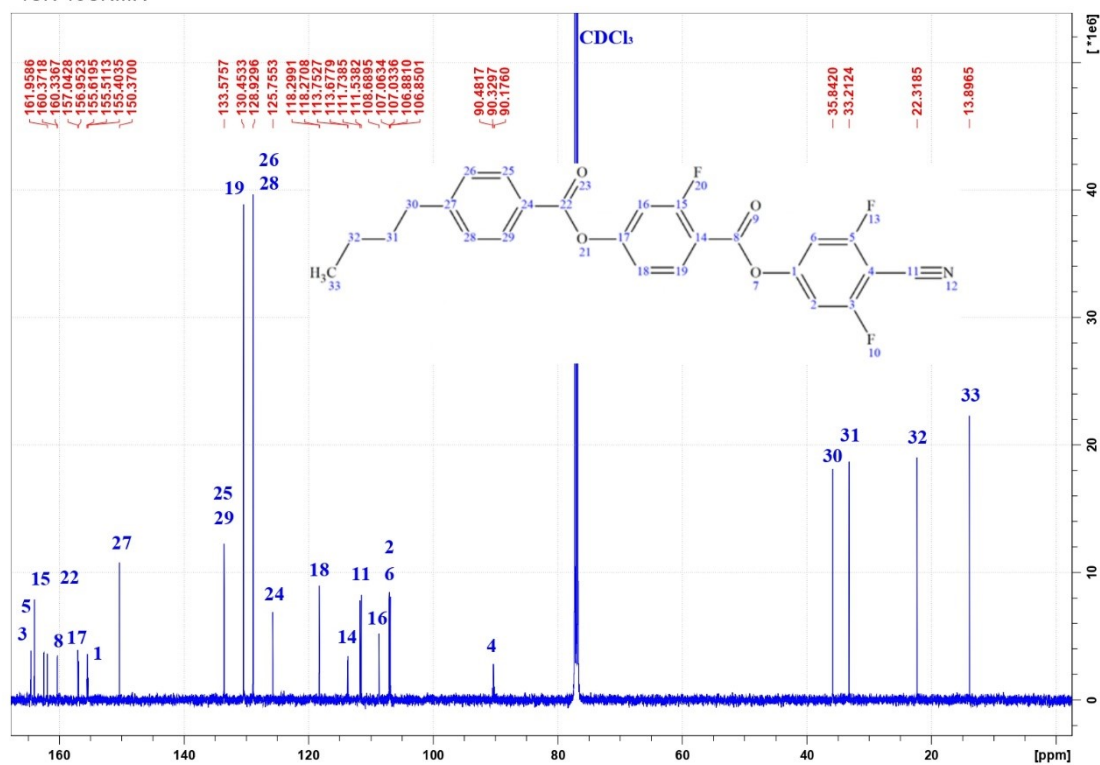

The purity of 3CN and 4CN compounds was determined by thin-layer chromatography (TLC) and GC-MS(EI) (Agilent 6890N, Santa Clara, CA, USA) chromatography systems. GC chromatograms with MS spectra are presented below.

# 3CN GC/MS

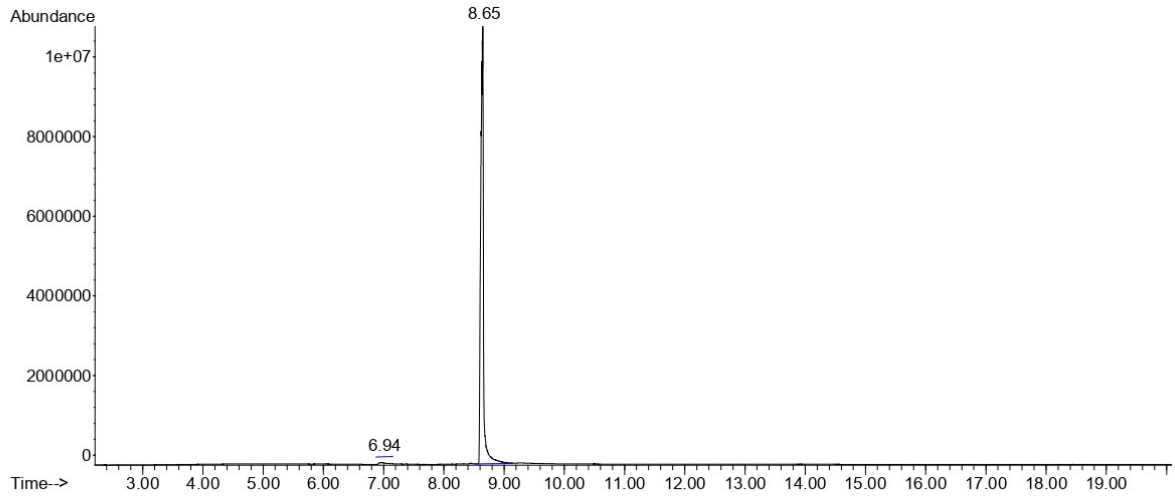

| peak # | R.T. min | Start min | End min | PK TY | peak height | corr. area | corr. % max. | % of total |
|--------|----------|-----------|---------|-------|-------------|------------|--------------|------------|
| 1      | 6.940    | 6.874     | 7.154   | M     | 47843       | 3384325    | 0.96%        | 0.953%     |
| 2      | 8.646    | 8.526     | 9.131   | M     | 11139128    | 351764372  | 100.00%      | 99.047%    |

Sum of corrected areas: 355148697

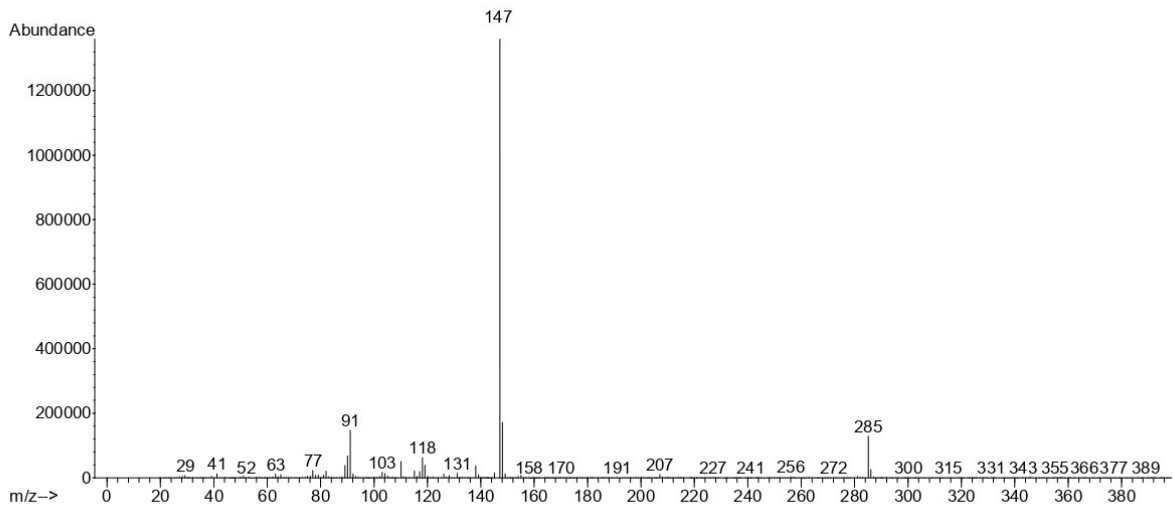

# 4CN GC/MS

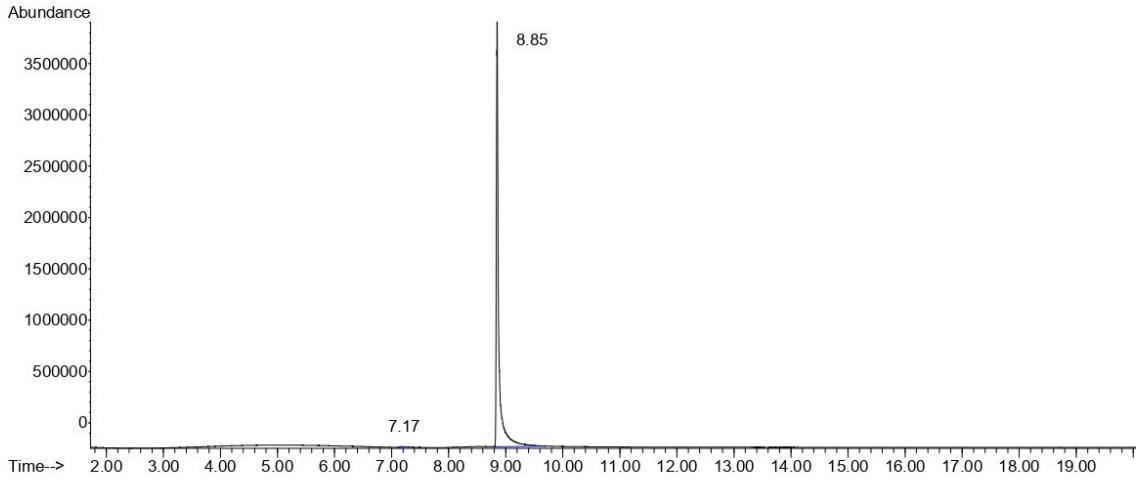

| peak # | R.T. min | Start min | End min | PK TY | peak height | corr. area | corr. % max. | % of total |
|--------|----------|-----------|---------|-------|-------------|------------|--------------|------------|
| 1      | 7.167    | 7.123     | 7.249   | M     | 7158        | 251709     | 0.22%        | 0.216%     |
| 2      | 8.850    | 8.798     | 9.710   | M     | 4215081     | 116220732  | 100.00%      | 99.784%    |

Sum of corrected areas: 116472441

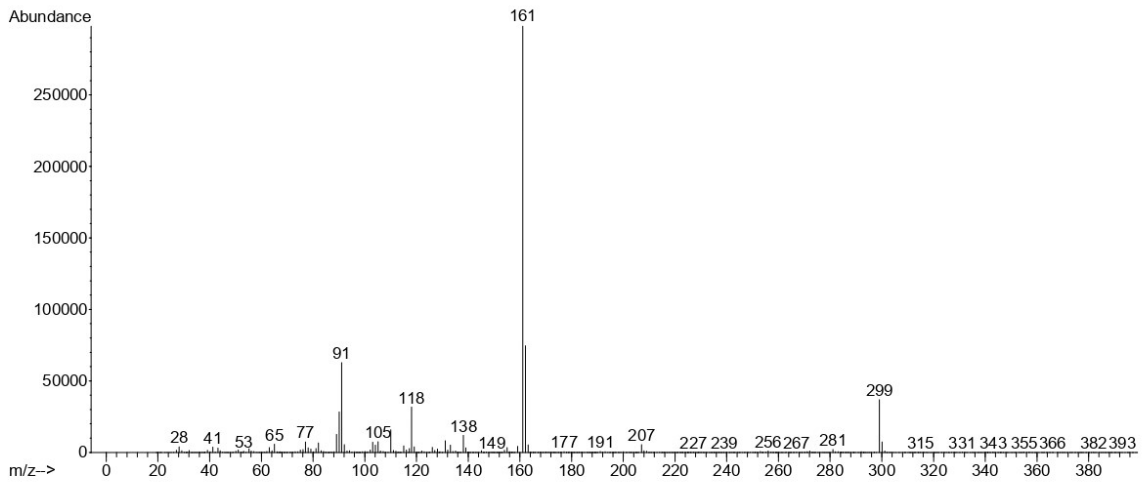

Supplement: d4tc01038h2.pdf [file d4tc01038h2.pdf]
